# Supplementary material
Source: publisher figshare collection journal article supplement (https://acs.figshare.com/ndownloader/files/5807031)
Supplement: Supplementary file 1 [file 5807031]

Supporting information for

**Piezoelectric and Dielectric Properties of Multilayered  
BaTiO<sub>3</sub>/(Ba,Ca)TiO<sub>3</sub>/CaTiO<sub>3</sub> Thin Films**

*Xiao Na Zhu,<sup>1,2</sup> Ting Ting Gao,<sup>1</sup> Xing Xu,<sup>2</sup> Wei Zheng Liang<sup>3</sup>, Yuan Lin<sup>3</sup>, Chonglin Chen<sup>2,\*</sup>, Xiang Ming Chen<sup>1,\*</sup>*

<sup>1</sup>Laboratory of Dielectric Materials, Department of Materials Science and Engineering, Zhejiang University, Hangzhou 310027, China

<sup>2</sup>Department of Physics and Astronomy, University of Texas at San Antonio, Texas 78249, USA

<sup>3</sup>State Key Laboratory of Electronic Thin films and Integrated Devices, University of Electronic Science and Technology of China, Chengdu, Sichuan 610054, China

\* Corresponding authors: Chonglin.Chen@utsa.edu & xmchen59@zju.edu.cn.

**Table S1** The bulk lattice constant of every composition layer and substrate.

| Compositions                                             | a (Å)            | b (Å)            | c (Å)            |
|----------------------------------------------------------|------------------|------------------|------------------|
| BaTiO <sub>3</sub>                                       | 3.997            | 3.997            | 4.037            |
| CaTiO <sub>3</sub>                                       | 5.387            | 5.439            | 7.646            |
| (Orthohombic)                                            | (3.809 in cubic) | (3.846 in cubic) | (3.823 in cubic) |
| (Ba <sub>0.85</sub> Ca <sub>0.15</sub> )TiO <sub>3</sub> | 3.972            | 3.972            | 4.019            |
| (Ba <sub>0.75</sub> Ca <sub>0.25</sub> )TiO <sub>3</sub> | 3.959            | 3.959            | 4.003            |
| Nb:SrTiO <sub>3</sub>                                    | 3.905            | 3.905            | 3.905            |

According to Bragg equation:

$$2d_{hkl} \sin \theta = n\lambda \quad (S1)$$

The  $d_{002}$  of peak1, Peak2, and Peak3 can be calculated, and  $d_{001}$  ( $d_{001}=2d_{002}$ ) corresponds to the out of plane constant  $c_{\text{measured}}$ . Based on the unchanged volume of each layer, the in plane constant  $a_{\text{film}}$  can be calculated from equation S2:

$$a_{\text{bulk}} \times b_{\text{bulk}} \times c_{\text{bulk}} = a_{\text{film}} \times b_{\text{film}} \times c_{\text{measured}} \quad (S2)$$

Where the  $a_{\text{bulk}}$ ,  $b_{\text{bulk}}$  and  $c_{\text{bulk}}$  of each layer can be obtained from Table S1, the  $C_{\text{measured}}$  is the calculated  $d_{001}$ , thus we can get the in plane constant of each layer  $a_{\text{film}} = b_{\text{film}}$ .

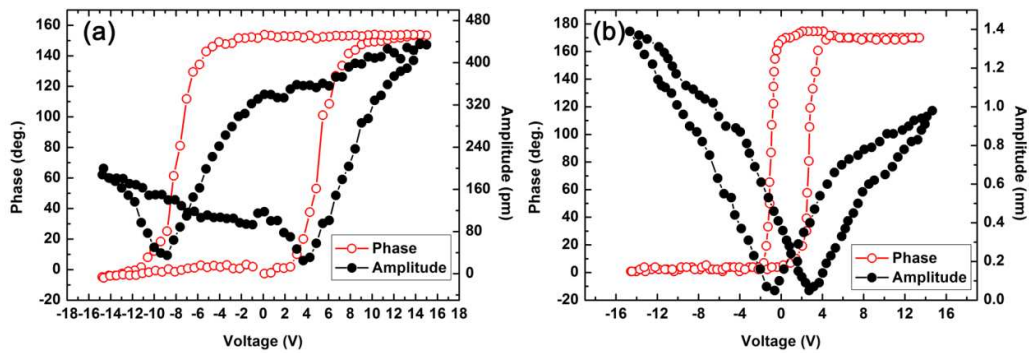

**Figure S1.** Comparison of SS-PFM (a) and conventional PFM (b) of amplitude-voltage butterfly loops and phase-voltage hysteresis loops for CT<sup>(1)</sup>/BCT15<sup>(1)</sup>/BT<sup>(1)</sup> sample.

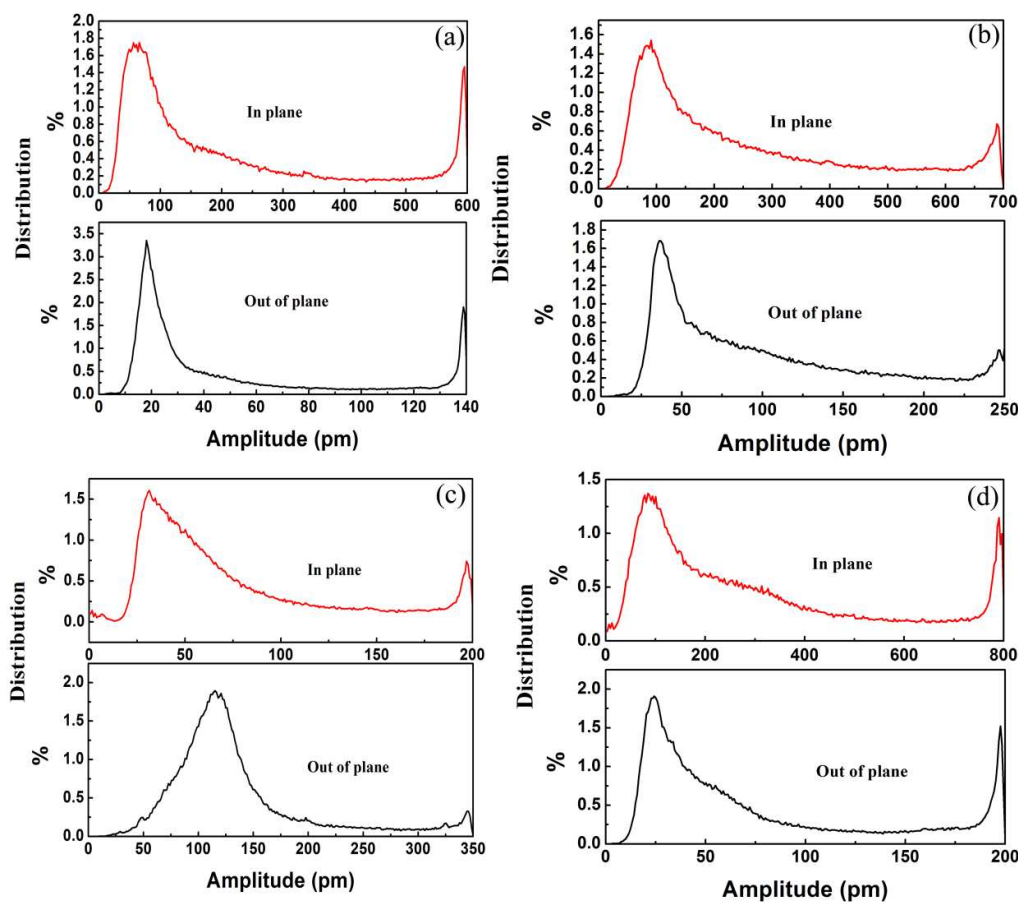

**Figure S2.** Distribution of amplitude in Figure 3 and Figure 4 for (a)S1:  $CT^{(1)}/BCT15^{(1)}/BT^{(1)}$  (b)S2:  $CT^{(1)}/BCT15^{(1)}/BT^{(2)}$  (c) S3:  $CT^{(1)}/BCT25^{(1)}/BT^{(1)}$  (d)S4:  $CT^{(1)}/BCT25^{(1)}/BT^{(2)}$ .

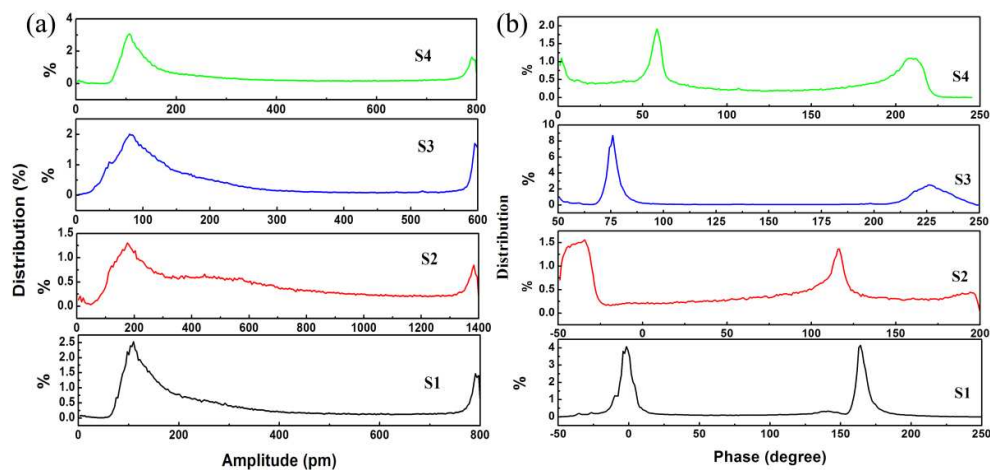

**Figure S3.** Distribution (a) of amplitude (b) and phase contrast in Figure 5.
